# Supplementary material
Source: PubMed Central journal article supplement (PMC6070760)
Supplement: AEM.00814-18_zam016188659s1.pdf [file AEM.00814-18_zam016188659s1.pdf]

1 **Engineering *Escherichia coli* for glutarate production as C5 platform**

2 **backbone**

3 Mei Zhao<sup>1,2</sup>, Guohui Li<sup>1,2</sup>, and Yu Deng<sup>1,2\*</sup>

4 <sup>1</sup> National Engineering Laboratory for Cereal Fermentation Technology (NELCF),  
5 Jiangnan University, 1800 Lihu Road, Wuxi, Jiangsu 214122, China.

6 <sup>2</sup> School of Biotechnology, Jiangnan University, 1800 Lihu Rd, Wuxi, Jiangsu 214122,  
7 China.

8 \* Correspondence to:

9 Yu Deng: National Engineering Laboratory for Cereal Fermentation Technology  
10 (NELCF), Jiangnan University, 1800 Lihu Road, Wuxi, Jiangsu 214122, China.

11 Phone: +86-510-85329031, Fax: +86-510-85918312

12 E-mail: dengyu@jiangnan.edu.cn

13

14

15

16

17

18

19

20

21

22

23

24

25

26 **Supplementary Table S1 Strains and plasmids used in this study**

| Name            | Relevant genotype                                                                                                                      | Reference      |
|-----------------|----------------------------------------------------------------------------------------------------------------------------------------|----------------|
| <b>Strains</b>  |                                                                                                                                        |                |
| JM109           | For plasmid construction                                                                                                               | Prof. Zhou (1) |
| BL21(DE3)       | For expressing genes                                                                                                                   | Prof. Zhou (1) |
| Bgl146          | BL21(DE3) carrying pAD1, pAD4 and pAD6                                                                                                 | This study     |
| Bgl1            | BL21(DE3) $\Delta$ <i>arcA</i>                                                                                                         | This study     |
| Bgl1146         | Bgl1 carrying pAD1, pAD4 and pAD6                                                                                                      | This study     |
| Bgl4            | BL21(DE3) $\Delta$ <i>arcA</i> $\Delta$ <i>ldhA</i> $\Delta$ <i>atoB</i> $\Delta$ <i>pf1B</i>                                          | This study     |
| Bgl4146         | Bgl4 carrying pAD1, pAD4 and pAD6                                                                                                      | This study     |
| <b>Plasmids</b> |                                                                                                                                        |                |
| pRSFDuet-1      | RSF ori, lacI, T7 lac, Kan <sup>R</sup>                                                                                                | Novagen(1)     |
| pCDFDuet-1      | CloDF13 ori, lacI, T7 lac, Strep <sup>R</sup>                                                                                          | Novagen(1)     |
| pTrc99a         | pBR322 ori, trc, Amp <sup>R</sup>                                                                                                      | Novagen        |
| pUC57-1         | pUC57 harboring the optimized gene <i>Tfu-0875</i> from <i>Thermobifida fusca</i> , Amp <sup>R</sup>                                   | Genewiz        |
| pUC57-2         | pUC57 harboring the optimized gene <i>Tfu-2399</i> from <i>Thermobifida fusca</i> , Amp <sup>R</sup>                                   | Genewiz        |
| pUC57-3         | pUC57 harboring the optimized gene <i>Tfu-0067</i> from <i>Thermobifida fusca</i> , Amp <sup>R</sup>                                   | Genewiz        |
| pUC57-4         | pUC57 harboring the optimized gene <i>Tfu-1647</i> from <i>Thermobifida fusca</i> , Amp <sup>R</sup>                                   | Genewiz        |
| pUC57-5         | pUC57 harboring the optimized genes <i>Tfu-2576</i> and <i>Tfu-2577</i> from <i>Thermobifida fusca</i> , Amp <sup>R</sup>              | Genewiz        |
| pRSF- Tfu_0875  | pRSFDuet-1 harboring the optimized gene <i>Tfu-0875</i> from <i>Thermobifida fusca</i> , Amp <sup>R</sup><br>pUC57-1, Kan <sup>R</sup> | This study     |

|         |                                                                                                                                                                            |            |
|---------|----------------------------------------------------------------------------------------------------------------------------------------------------------------------------|------------|
| pAD1    | pRSFDuet-1 harboring the optimized genes <i>Tfu-0875</i> and <i>Tfu-2399</i> from pUC57-1 and pUC57-2, Kan <sup>R</sup>                                                    | This study |
| pAD4    | pTrc99a harboring the optimized genes <i>Tfu-0067</i> and <i>Tfu-1647</i> from pUC57-3 and pUC57-4, Amp <sup>R</sup>                                                       | This study |
| pAD6    | pCDFDuet-1 harboring the optimized genes <i>Tfu-2576</i> and <i>Tfu-2577</i> from pUC57-5, Strep <sup>R</sup>                                                              | This study |
| parcA   | pRSFDuet-1 harboring the <i>arcA</i> gene <i>upstream</i> and downstream 500bp from <i>E. coli</i> , Kan <sup>R</sup>                                                      | This study |
| pldhA   | pRSFDuet-1 harboring the <i>ldhA</i> gene <i>upstream</i> and downstream 500bp from <i>E. coli</i> , Kan <sup>R</sup>                                                      | This study |
| patoB   | pRSFDuet-1 harboring the <i>atoB</i> gene <i>upstream</i> and downstream 500bp from <i>E. coli</i> , Kan <sup>R</sup>                                                      | This study |
| ppflB   | pRSFDuet-1 harboring the <i>pflB</i> gene <i>upstream</i> and downstream 500bp from <i>E. coli</i> , Kan <sup>R</sup>                                                      | This study |
| pCas    | paraB-gam-bet-exo, bla (kan <sup>R</sup> ), kanR-repA101 (ts),λ-Red, the sgRNA with a lacI <sup>q</sup> -P <sub>trc</sub> promoter guiding the pMB1 replication of pTarget | Addgene(2) |
| pTarget | the sgRNA sequence, a targeting N20 sequence, the pMB1 replicon, Spe <sup>R</sup>                                                                                          | Addgene(2) |

27

28

29 **Supplementary Table S2 Primers used in this study**

| <b>Primer</b>                     | <b>Sequence (5' to 3')</b>                                       |
|-----------------------------------|------------------------------------------------------------------|
| <b>pUC57-1 F(<i>Eco</i>R I)</b>   | CGGAATTCATGACCGATGTTTATATTCTGGA                                  |
| <b>pUC57-1 R(<i>Hind</i> III)</b> | CCCAAGCTTTTAACGATGCAGAACGACGG                                    |
| <b>pUC57-2 F(<i>Bgl</i> II)</b>   | GAAGATCTATGGTTGAGGAAATTAATAAAG                                   |
| <b>pUC57-2 R(<i>Kpn</i> I)</b>    | GGGGTACCTTAACTCCGCAGAGTGCCT                                      |
| <b>pUC57-3 F(<i>Nco</i> I)</b>    | CATGCCATGGATGGGTGAATTTATCCGCTTTG                                 |
| <b>pUC57-3 R(<i>Hind</i> III)</b> | CCCAAGCTTTTATTCTTTTTTATTTTTGCGCGCC                               |
| <b>pUC57-4 F(<i>Nde</i> I)</b>    | GGGAATTCATATGATGTCTGATTTTGATCTGTACCGG                            |
| <b>pUC57-4 R(<i>Bln</i> I)</b>    | CCTAGGTTACTTTTTAAGCAGCTGCCG                                      |
| <b>pUC57-5 F(<i>Nco</i> I)</b>    | CATGCCATGGATGGCGATCTTTCTGACCAA                                   |
| <b>pUC57-5 R(<i>Hind</i> III)</b> | CCCAAGCTTTTATTTCTTCAGCAGCTGGC                                    |
| <b>pAD4-0067 F</b>                | GTGAGCGGATAACAATTTACACAGGAAACAGACCATGGATGGGTGA<br>ATTTATCCGCTT   |
| <b>pAD4-0067 R</b>                | CCGGTACAGATCAAAAATCAGACATTAATATATACCTCTTTTATTCTTTTT<br>TATTTTTGC |
| <b>pAD4-1647 F</b>                | AAAGAGGTATATATTAATGTCTGATTTTGATCTGTACC                           |
| <b>pAD4-1647 R</b>                | GCTGAAAATCTTCTCTCATCCGCCAAAACAGCCAAGCTTTTACTTTTTAA<br>GCAGCTGCC  |
| <b>up-parcA F</b>                 | CCTGACTGTACTAACGGTT                                              |
| <b>up-parcA R</b>                 | GCTAAAAAGCGCCGTTTTTTTTGACGGTGGTAAAGCCGAGTTTGCTACC<br>TAAATTGCCA  |
| <b>down-parcA F</b>               | TCGGCTTTACCACCGTCAAA                                             |
| <b>down-parcA R</b>               | CTGACTTTTATGGCGTTC                                               |
| <b>up-pldhA F</b>                 | CAAGCAGAATCAAGTTCTAC                                             |
| <b>up-pldhA R</b>                 | TCTGAATCAGCTCCCCTGGGTTGCAGGGGAGCGGCAAGAAAGACTTTC                 |

|                         |                                                                |
|-------------------------|----------------------------------------------------------------|
|                         | TCCAGTGATG                                                     |
| <b>down-pldhA F</b>     | TCTTGCCGCTCCCCTGCA                                             |
| <b>down-pldhA R</b>     | TGTCTGTTTCGCGGTCGCCA                                           |
| <b>up-patoB F</b>       | TACATAAAACGCCAATGG                                             |
| <b>up-patoB R</b>       | AAACACCCGATAACTTTCGCTATCGGGTGTTTTTATTGATTTATATTCT<br>TCTGTTT   |
| <b>down-patoB F</b>     | TCAATAAAAAACCCCGATAG                                           |
| <b>down-patoB R</b>     | CATCAGCCCGGATGGGCAAA                                           |
| <b>up-ppflB F</b>       | ATATGACCGCAAATGGTC                                             |
| <b>up-ppflB R</b>       | ATTGTACGCTTTTTACTGTACGATTCAGTCAAATCTAAGTAACACCTAC<br>CTTCTTAAG |
| <b>down-ppflB F</b>     | TTAGATTTGACTGAAATCGT                                           |
| <b>down-ppflB R</b>     | ACAGGTATGAATGCCTTC                                             |
| <b>veri-pRSF-0875 F</b> | ACTTTAATAAGGAGATATACCAT                                        |
| <b>veri-pRSF-0875 R</b> | CCGACGTCAGCGATCGCGTG                                           |
| <b>veri-pAD-1 F</b>     | CCCCTGTAGAAATAATTTTG                                           |
| <b>veri-pAD-1 R</b>     | ATAAACAAATAGGGGTTCCG                                           |
| <b>veri-pAD-4 F</b>     | TCAGGCAGCCATCGGAAGCT                                           |
| <b>veri-pAD-4 R</b>     | TTGCTCTTGCCCGGCGTCAA                                           |
| <b>veri-pAD-6 F</b>     | CAATCCCCTGTAGAAATAA                                            |
| <b>veri-pAD-6 R</b>     | AGAGAACATAGCGTTGCCTT                                           |
| <b>veri-pRSF F</b>      | TGTAGAAATAATTTTGTT                                             |
| <b>veri-pRSF R</b>      | CAGCGATCGCGTGGCCGG                                             |
| <b>veri-arcA F</b>      | CGGAATCTTCGCGACCAAAC                                           |

|                    |                      |
|--------------------|----------------------|
| <b>veri-arcA R</b> | TGGCCCTGAATTTAAGCGGT |
| <b>veri-ldhA F</b> | TTTATCGATATTGATCCAGG |
| <b>veri-ldhA R</b> | CTTTGTGTGCATTACCCAAC |
| <b>veri-atoB F</b> | GCACTCGGTATCGCTTACCT |
| <b>veri-atoB R</b> | AAGCTTGGCTGGTGGTCAAC |
| <b>veri-pflB F</b> | CTTTGTGTTGTCTGCGGAGC |
| <b>veri-pflB R</b> | CACCCATTGCCACCCATTTG |

30

31

32 **Supplementary Table S3 Synthesized genes or DNA sequences**

| Genes                  | Sequence (5'-3')                                                                                                                                                                                                                                                                                                                                                                                                                                                                                                                                                                                                                                                                                                                                                                                                                                                                                                                                                                                                                                                                                                                                                                                                                                                                                                                                            |
|------------------------|-------------------------------------------------------------------------------------------------------------------------------------------------------------------------------------------------------------------------------------------------------------------------------------------------------------------------------------------------------------------------------------------------------------------------------------------------------------------------------------------------------------------------------------------------------------------------------------------------------------------------------------------------------------------------------------------------------------------------------------------------------------------------------------------------------------------------------------------------------------------------------------------------------------------------------------------------------------------------------------------------------------------------------------------------------------------------------------------------------------------------------------------------------------------------------------------------------------------------------------------------------------------------------------------------------------------------------------------------------------|
| <b><i>Tfu-0875</i></b> | <p>GAATTCATGACCGATGTTTATATTCTGGATGCCGTTCCGACTCCTTTCGGGCGCTACG<br/> GTGGGGCTTTATCGGGAATCCGGCCTGATGATCTGGCGGCACATGTCTTGCGGGCTT<br/> TAGCGGAACGTAGTCCGGGGCTGGATCCAGCGGCGGTGACGATGTTTTCTTCGGT<br/> GATGCGAACGGCGCCGGTGAGGATAATCGCAACGTCGCCCGCATGGCTGCCCTGCT<br/> GGCGGGATGGCCTACCTCTGTGCCGGGTGTAACCTTGAACCGGCTTTCGGGGTCCG<br/> GCATGGAGTCCGTGATCGCTGCGAACCGCGCTATTGCGGTGCGGTGACGCTTCGCTG<br/> GCCGTTGCGGGTGGTGTGAATCGATGTCTCGCGCGCCGTGGGTGCTGCCGAAACC<br/> TGCTCAAGGTTTTCCGACTGGCCACGAAACGCTGTATTCCACAACCTTAGGCTGGCG<br/> CATGGTTAACCAGCCATGCCGGAACAATGGACGGTGTCTCTGGGAGAGTCCACCG<br/> AGCAGGTGGCGGCGACGTACGGTATTTCTCGCGGGAACAGGACGCCTTCGCGCTG<br/> CGCTCTACGAACGTGCGGCGCGCGCTTGGGCAGAAGGCGTCTTCGACCCGAAAT<br/> CACCCAAATTCCTGGTGGGAGCTGGAGCGTGACGAGAGCATTTCGCGAAACGTCGG<br/> CCGAGAAGCTCGCGGCGCTGAAACCGGCGTTTCGTCCTGATGGTACGATCACTGCA<br/> GGCAACGCGTCTCCTCTTAACGACGGCGCCGAGCATTGCTGATTGGCGATGCAGCC<br/> GCTGCTGAACGTGTTGGTCGCGAACCATAGCCCGGATCGTGAGCCGTGGTGTTC<br/> CGCCGTAGACCCGGATGTGTTCCGGGATCGGTCCGGTACAGGCCGCTGAGATTGCC<br/> TGCGCCGGGCTGGGATTGGTTGGGATGACCTGTCGGTTGTCGAACTGAACGAAGCG<br/> TTTGCGGCCAGAGCCTTGCCTGCTGAACTTGGCCCGACCTGGATCCAGAAATT<br/> GTTAATCCTAACGGAGGCCATTGCGATTGGACATCCATTGGGCGCTAGTGGTGCC<br/> CGCATTGTTGGAACACTGGCTCACGAACTGCATCGGCGGGGTGGTGGCTGGGGCTT<br/> AGCTGCCATTTGTATCGGCGTCGGACAGGGGTTGGCCGTCGTTCTGCATCGTTAAAA<br/> GCTT</p> |
| <b><i>Tfu-2399</i></b> | <p>AGATCTATGGTTGAGGAAATTAATAAAGTGGGCGTAGTCGGCCTGGGTACAATGGG<br/> AGCGGGCATTGTCGAGGTATTTGCACGCGCCGGTTTCACCGTACTGGCGTCGAAA<br/> TCGACGACGCGGCGCTGGAACGTGGACGGACCCATTTAGAAAAAAGCCTGGCCAAA</p>                                                                                                                                                                                                                                                                                                                                                                                                                                                                                                                                                                                                                                                                                                                                                                                                                                                                                                                                                                                                                                                                                                                                                                  |

GCTGTGGCAAAAGGAAAGCTCACCGAAGATGAGCAGCGCGGATCCTCGGCCGCGT  
 GACCTTCACCACGTCCCGCGATGACCTGGCAGACGCACATCTGGCCGTGGAGGCAG  
 TTCCGGAGCGGCTGGACATTAAACGTTCCGTTTTCCGGACCTCGATCGCATCTTACC  
 CCCCAGCCATTCTGGCAACGAATACGTCAAGCCTGTCGGTTACCGAAATTGCGGC  
 CCTGACGTCGCGCCCCGGCAAAGTTATTGGTCTGCACTTCTTCAACCCCGCGCCCGTT  
 ATGCGTTTAGTGGAGATCGTTACCACCGTTGTAACCGAACCTCATGTTCTGTAACC  
 GCAACCCAGGTTGTGACCCGTCTGGGCAAAACACCAGTGGCGGTTGGAGATCGTGC  
 GGGCTTTGTTGCCAACGCGCTGTTAGTGCCATATCTGAATCATGCAGTCGCAGTTTA  
 CGAACAGGGCCTGGCGACCCGCGAACAGATCGATGCGGCCATTACCTCGGCAGCCG  
 GTTCCCGATGGGTCTCTGACATTGATGGATCTGGTGGGTCTGGATGTTCTGTTGG  
 ATGTTATGGATGTGTTATGGGATGAGTCCGGCGCCCGGTTATGCTGCAGCCCCAC  
 TGCTGCGTCGCATGGTTGCTGCCGGGCTGCTTGGCCGAAAAGTGGGCGCGTTTTT  
 ACGATTATCCGGAGCCGACAACCCGGCAGAACCTGAACCTACGGCTCCTTTAGCAC  
 AACTGGTTGGTGACGGGCCTGGCCAGATTTGCTGGCGGACCTGCTGTTAGTTCCGC  
 ATTTGAATGACGCAGCACGCATGATTGGCGATGGCTATGCTACCGCAGACGATGTA  
 GATACGGCTATGCGTCTGGGCTGCGGGTATCCGAAAGGTTTAGCAGCCATGCTGGA  
 TGAACGTGGAGTGAAAAACGTGACGGAGACCTTGGCAGAATTGGCTGCAGCCGGTT  
 TGTTACCGATGATACAGCGCCACTCCTGACGATGCTCGCGAAACAAGGTAAGGAC  
 ACTCTGCGGAGTTAAGGTACC

***Tfu-0067***

**CCATGG**ATGGGTGAATTTATCCGCTTTGAGTCTGACGGACCAGTTCGCCATATCGTC  
 CTGAACGCCCCGAGCGGCTGAATGCCCTGGATCGTCCGATGCTGGCAGAGCTGGC  
 GGAGGCGGTACGCGCAGTGGCCGCCGATGAGGAGGCACGTGCCCTGGTAGTTTCG  
 GCGCAGGACGCGCTTTTTCGCTGGCGGGATGTTACGAGCTTATTTGGCGACCC  
 GACCCGGCCCCAGCGGTTATTCGTGACGAGCTGAAACAAGTCTATGCGAGTTTCTT  
 GTCTATTGCGGATCTGACAATCCCAACGATCGCGGCGGTGGGAGGCATTGCCGTCG  
 GCGCCGGTGTGAATATTGCAATGGCCTGCGATATGGTAGTGGCGGGTCCGAAAGCC  
 AAATTTGCGATCACCTTCGCCGAAATGGGACTGCATCCGGGCGGTGGTTGCTCCTGG



|                 |                                                                                                                                                                                                                                                                                                                                                                                                                                                                                                                                                                                                                                                                                                                                                                                                                                                                                                                                                                                                                                                                                                                                                                                                                                                                                                                                                          |
|-----------------|----------------------------------------------------------------------------------------------------------------------------------------------------------------------------------------------------------------------------------------------------------------------------------------------------------------------------------------------------------------------------------------------------------------------------------------------------------------------------------------------------------------------------------------------------------------------------------------------------------------------------------------------------------------------------------------------------------------------------------------------------------------------------------------------------------------------------------------------------------------------------------------------------------------------------------------------------------------------------------------------------------------------------------------------------------------------------------------------------------------------------------------------------------------------------------------------------------------------------------------------------------------------------------------------------------------------------------------------------------|
|                 | <p>TTTCTGACGCGCCGTATGGGAGGCCATCGCGCTCTCGCGACTCTGTTAGACGCGGAA<br/> CGCATCGATGCCGAGGAGGCGTTCCGTGCTGGCCTTGTGACTCGCCTCGTCGAGGA<br/> TCCTGTGGCAGAAGCTCTTGCATGGCACATAGCTATGCGGAACGGGACCCAGGCC<br/> TGGTACGGGACATGAAACGTGCCGTCCGCATGGCTGAAACTGCCGATCTTGCTACC<br/> GTGCTTGAATTTGAGTCGTGGGCGCAGGCTTCAAGCGTAAACTCCCCGCGCTCCAG<br/> GAGTTTTTAGCGGAGTTTGC GGCGCGCAAAAATAAAAAAGAATAA<b>AAGCTT</b></p>                                                                                                                                                                                                                                                                                                                                                                                                                                                                                                                                                                                                                                                                                                                                                                                                                                                                                                                                                                 |
| <b>Tfu-1647</b> | <p><b>CATATG</b>ATGTCTGATTTTATCTGTACCGGCCGACTGAAGAACATGAGGCTTTGCGT<br/> GAAGCAATTCGGAGTGTGGCCGAAGACAAAATCGCGCCGCATGCTGCCGATGTAGA<br/> TGAACAAAGCCGCTTCTCAGGAGGCATACGAAGCTCTCCGCGCATCCGATTTTCA<br/> TGCCCCGCATGTCGCGGAGGAGTACGGCGGTGTCGGAGCAGATGCCTTGCGGACCT<br/> GCATCGTCATTGAAGAAATCGCCGGGTGTGTGCAAGCTCGTCACTGATCCCGGCCG<br/> TTAATAAACTGGGTAGTATGCCTTTGATTTTAAGCGGCTCAGACGAAGTGAAACAAC<br/> GTTATTTGCCGAGCTTGCATCCGGGGAAGCGATGTTTAGTTATGGATTAAGTGAGC<br/> GCGAAGCCGGTTCGGACACGGCTTCAATGCGTACTCGCGCGGTCCGTGATGGCGAC<br/> GATTGGATCCTGAACGGTCAGAAATCGTGGATTACAAACGCGGGCATTTCAAAATAT<br/> TATACGGTCATGGCGGTCACCGACCCGGACGGCCCGGTGGCCGCAACATTAGTGC<br/> ATTTGTTGTTTCATATTGATGACCCTGGCTTCTCTTTTGGTGAGCCAGAGCGTAAATTA<br/> GGTATCAAAGGATCACCGACCCGCGAACTGATTTTGGACAACGTGCGTATCCCAGGT<br/> GATCGGCTTGTTGGTAAGGTTGGCGAAGGACTGCGTACCGCTCTGCGCACACTGGA<br/> CCATACCCGCGTCACCATCGGTGCACAGGCCGTTGGTATTGCTCAGGGTGCCTTGA<br/> CTACGCATTAGGCTATGTTAAAGAACGTAAACAATTCGGTAAAGCGATTGCTGATTT<br/> TCAGGGAATTCAGTTCATGTTAGCTGACATGGCGATGAAGCTGGAAGCAGCACGTC<br/> AGATGGTTTATGTCGACGCGCAAAATCTGAACGCGATGATGCCGATCTGTCCTTCT<br/> ATGGCGCGGCAGCAAAGTGCTTCGCCAGTGATGTCGCTATGGAGATTACTACTGAT<br/> GCCGTGCAACTGCTGGGTGGTTATGGTTACACCCGGGACTATCCTGTTGAGCGCATG<br/> ATGCGCGACGCGAAAATCACACAAATCTACGAAGGTACGAACCAAATCCAGCGCGT<br/> TGTCATGGCACGGCAGCTGCTTAAAAAGTAA<b>CCTAGG</b></p> |

Tfu\_2576-7

CCATGGATGGCGATCTTTCTGACCAAAGATTCTAAGGTGCTGGTGCAGGGCATGACC  
GGCAGTGAAGGGACCAAGCACACGCGCCGCATGCTGGCTGCAGGAACTAATATTGT  
TGGGGGTGTCAACCCACGCAAAGCTGGCCAAGTTGTAGATTTTGACGGGACGCAGG  
TGCCAGTATTTGGTAGTGTGCGGGAAGGCATGAAAGCTACGGGAGCGGATGTGACA  
GTCATTTTTGTTCCCCAAAATTTGCGAAAGACGCGGTGATTGAGGCCATTGACGCT  
GAAATTGGCCTGGCAGTTGTTATTACCGAAGGAATCCCGGTACACGACACTGCTACG  
TTCTGGGCGCATGCGTGCTCTAAAGGAAATAAAACGCGTATCATCGGGCCAAATTGC  
CCGGGTTTAATTACACCGGGGCAGAGCAACGCTGGCATTATTCCTGCAGATATTACC  
AAACCCGGCCGCATCGGCCTGGTGAGCAAATCGGGGACGTTAACTTACCAGATGAT  
GTATGAATTACGTGACATCGGATTTAGTACCTGTGTGGGTATTGGCGGGGATCCGAT  
TATCGGTACCACGCATATTGATGCACTCGCCGATTTGAAGCGGATCCGGATACGGA  
CGTTATCGTGATGATTGGAGAAATTGGCGGCGACGCGGAAGAGCGCGCAGCGGAG  
TACATCAAAAAACATGTTACCAAACCGGTGGTGGGGTATATTGCGGGGTTTACAGCA  
CCGGAAGGTAAAACGATGGGTACGCGGAGCGATCGTCTCCGGCTCTTCTGGGAC  
GGCCCGCGCAAAAAAAGAAGCCCTGGAGGCAGTCGGCGTGAAGGTGGGTAAAAC  
CCGAGTGAAGCTGCGAAGTTAGTCCGTTGCTGTTTCATGAGCGATTCGATCTGTAC  
CGGCCAACCGAAGAACATGAAGCGTTACGCGAAGCTATCCGCTCAGTGGCCGAAGA  
TAAAATCGCACCATGCCGCAGACGTGGATGAACAGAGCCGCTTCCCGCAGGAAG  
CGTACGAAGCACTTCGCGCATCAGATTTCCATGCTCCTCATGTTGCGGAAGAATATG  
GAGGCGTAGGCGCCGACGCCCTGGCAACGTGTATTGTGATCGAAGAAATTGCCCGT  
GTTTGTGCATCAAGCTCCCTCATCCCTGCGGTGAATAAGCTGGGCTCAATGCCCTG  
ATTCTGTCGGGTTCTGATGAAGTGAAACAGCGGTACTIONACCGGAACTGGCCTCTGGT  
GAGGCGATGTTTAGTTATGGCCTGAGCGAACGTGAAGCCGGCAGTGACACTGCTTC  
GATGCGTACGCGTGCTGTACGCGACGGTGACGATTGGATTCTGAACGGCCAGAAAA  
GTTGGATCACGAACGCGGGTATTAGCAAATACTACACCGTGATGGCGGTTACGGAT  
CCGGATGGCCCGCGCGGTGTAACATCTCCGCATTTGTTGTACACATTGATGACCCT  
GGATTTTCGTTGCGCGAACCGGAACGTAAATTAGGGATCAAAGGCTCGCCGACGCG

|                                                                                    |                                                                                                                                                                                                                                                                                                                                                                                                                                                                                                                                                                                                                |
|------------------------------------------------------------------------------------|----------------------------------------------------------------------------------------------------------------------------------------------------------------------------------------------------------------------------------------------------------------------------------------------------------------------------------------------------------------------------------------------------------------------------------------------------------------------------------------------------------------------------------------------------------------------------------------------------------------|
|                                                                                    | <p>TGAATTGATCTTCGACAATGTTTCGCATTCCCGGAGACCGTCTGGTGGGGAAAGTAG<br/> GTGAGGGCCTGCGTACAGCTCTGCGTACCCTTGACCATACTCGCGTGACGATTGGTG<br/> CGCAAGCCGTTGGGATCGCGCAAGGTGCACTGGATTATGCGCTTGGGTATGTTAAA<br/> GAACGCAAACAGTTTGAAAAAGCGATTGCCGATTTCCAGGGCATCCAATTTATGCTG<br/> GCCGACATGGCCATGAAACTGGAGGCGGCTCGCCAGATGGTCTACGTGGCTGCAGC<br/> GAAATCGGAGCGCGACGATGCGGATCTGAGCTTCTATGGCGCGGCGGCAAATGTT<br/> TTGCCTCAGATGTGGCGATGGAAATTACCACGGATGCAGTCCAAGTGTAGGCGGTT<br/> ACGGCTATACGCGCGACTACCCCGTTGAACGTATGATGCGGGACGCGAAAATCACC<br/> CAGATTTACGAAGGTACCAATCAAATCCAACGCGTGGTGATGGCGCGCCAGCTGCT<br/> GAAGAAATAA<b>AAGCTT</b></p> |
| <b>The sgRNA targeting <i>arcA</i> gene</b>                                        | TGACATCAACCTGGTGATCATGG                                                                                                                                                                                                                                                                                                                                                                                                                                                                                                                                                                                        |
| <b>The sgRNA targeting <i>atoB</i> gene</b>                                        | AACGTGTTACAAGCCGGGCTGGG                                                                                                                                                                                                                                                                                                                                                                                                                                                                                                                                                                                        |
| <b>The sgRNA targeting <i>ldhA</i> gene</b>                                        | TATATCGCCCTGCGCTGTGCCGG                                                                                                                                                                                                                                                                                                                                                                                                                                                                                                                                                                                        |
| <b>The sgRNA targeting <i>pflB</i> gene</b>                                        | GAAAAACTACACTCCGTACGAGG                                                                                                                                                                                                                                                                                                                                                                                                                                                                                                                                                                                        |
| <b>The <i>arcA</i> gene upstream and downstream 500bp from <i>E. coli</i> BL21</b> | <p>CCTGACTGTACTAACGGTTGAATTGTTAAAAAATGCTACATATCCTTCTGTTTACTTA<br/> GGATAATTTTATAAAAAATAAATCTCGACAATTGGATTACCCACGTTTATTAGTTGTA<br/> TGATGCAACTAGTTGGATTATTAATAAATGTGACGAAAGCTAGCATTTAGATACGA<br/> TGATTTTCATCAAAGTGAACGTGCTACAATTGAACTTGATATATGTCAACGAAGCGT<br/> AGTTTTATTGGGTGTCCGGCCCCTTAGCCTGTTATGTTGCTGTTAAAAATGGTTAGG</p>                                                                                                                                                                                                                                                                                  |

|                                                                                                                |                                                                                                                                                                                                                                                                                                                                                                                                                                                                                                                                                                                                                                                                                                                                                                                                                                                                                                             |
|----------------------------------------------------------------------------------------------------------------|-------------------------------------------------------------------------------------------------------------------------------------------------------------------------------------------------------------------------------------------------------------------------------------------------------------------------------------------------------------------------------------------------------------------------------------------------------------------------------------------------------------------------------------------------------------------------------------------------------------------------------------------------------------------------------------------------------------------------------------------------------------------------------------------------------------------------------------------------------------------------------------------------------------|
|                                                                                                                | <p>ATGACAGCCGTTTTTGACTGTGCGGGTCTGAGGGAAAGTACCCACGACCAAGCTA<br/> ATGATGTTGTTGACGTTGATGGAAAGTGCATCAAGAACGCAATTACGTACTTTAGTC<br/> ATGTTACGCCGATCATGTTAATTTGCAGCATGCATCAGGCAGGTCAGGGACTTTTGT<br/> ACTTCCTGTTTCGATTTAGTTGGCAATTTAGGTAGCAAACCTCGGCTTTACCACCGTCA<br/> AAAAAACGGCGCTTTTTAGCGCCGTTTTTATTTTTCAACCTTATTTCCAGATACGTAA<br/> TTGATCGTCCATTGTAACCTCTTTACTGGCTTTCATTTTCGGCAGTGAAAACGCATACC<br/> AGTCGATATTACGAGTCACAAACATCATGCCGGCCAGCGCCACCACCAGCACACTGG<br/> TTCCAACAACAGCGCGCTATCGGCAGAGTTGAGCAGTCCCCACATCACACCATCCA<br/> GCAACAACAGCGCGAGGGTAAACAACATGCTGTTGCGCCAGCCTTTCAATACCGCT<br/> GCAAATAAATACCGTTCATTAACGCCCAATCAGACTGGCGATTATCCATGCCACGG<br/> TAAAACCGATATGTTTCAGAAAGCGCCAGCAAGAGCAAATAAAACATCACCAATGAA<br/> AGCCCCACCAGCAAATATTGCATTGGGTGTAAACGTTGCGCGGTGAGCGTTTCAAAA<br/> ACAAAGAACGCCATAAAAAGTCAG</p>                                                                                         |
| <p><b>The <i>ldhA</i> gene<br/> upstream and<br/> downstream<br/> 500 bp from <i>E.<br/> coli</i> BL21</b></p> | <p>CAAGCAGAATCAAGTTCTACCATGCCGACGTTCAATAACCAGCGGCTGGGATGTGA<br/> AAGGCTGGCGTTGGTGATATGCGCAAGCTGACAATCTCCACCAGATAACGGAGAT<br/> CGGGAATGATTAAACCTTTACGCGTAATGCGTGGGCTTTCATCTAATGCAATACGTG<br/> TCCCAGCGGTAGCCAGATGCCCGCCAGCGTGGGAACCCACAGCCCCGAGCGTCATC<br/> AGCAGCGTCAACGGCACAAGAATAATCAGTAATAACAGCGCGAGAACGGCTTTATA<br/> TTTACCAGCATGGGTAGTTAATATCCTGATTTAGCGAAAAATTAAGCATTCAATACG<br/> GGTATTGTGGCATGTTTAACCGTTCAGTTGAAGGTTGCGCCTACACTAAGCATAGTT<br/> GTTGATGAATTTTTCAATATCGCCATAGCTTTCAATTATATTTGAAATTTGTAAAATA<br/> TTTTAGTAGCTTAAATGTGATTCAACATCACTGGAGAAAGTCTTTCTTGCCGCTCCC<br/> CTGCAACCCAGGGGAGCTGATTAGATAATCCCCAATGACCTTTCATTCTCTATTCTT<br/> AAAATAGTCCTGAGTCAGAACTGTAATTGAGAACCACAATGAAGAAAGTAGCCGC<br/> GTTTGTGCGCTAAGCCTGCTGATGGCGGGATGTGTAAGTAATGACAAAATTGCTGT<br/> TACGCCAGAACAGCTACAGCATCATCGCTTGTGCTGGAAAGCGTAAACGGTAAGCC<br/> CGTGACCAGCGATAAAAATCCGCCAGAAATCAGCTTTGGTGAAAAAATGATGATTTT</p> |

|                                                                                                                |                                                                                                                                                                                                                                                                                                                                                                                                                                                                                                                                                                                                                                                                                                                                                                                                                                                                                                                                                                                                                                                                                                                                         |
|----------------------------------------------------------------------------------------------------------------|-----------------------------------------------------------------------------------------------------------------------------------------------------------------------------------------------------------------------------------------------------------------------------------------------------------------------------------------------------------------------------------------------------------------------------------------------------------------------------------------------------------------------------------------------------------------------------------------------------------------------------------------------------------------------------------------------------------------------------------------------------------------------------------------------------------------------------------------------------------------------------------------------------------------------------------------------------------------------------------------------------------------------------------------------------------------------------------------------------------------------------------------|
|                                                                                                                | <p>CGGCAGCATGTGTAACCGCTTTAGCGGTGAAGGCAAACGTCTAATGGTGAACCTGA<br/> CAGCCAAAGGGCTGGCAATGACCCGTATGATGTGCGCTAACCCGAGCTTAATGAA<br/> CTCGATAACACCATTAGCGAAATGCTGAAAGAAGGTGCACAAGTGGATCTGACCGC<br/> GAACCAGTTAACGCTGGCGACCGCGAAACAGACA</p>                                                                                                                                                                                                                                                                                                                                                                                                                                                                                                                                                                                                                                                                                                                                                                                                                                                                                                      |
| <p><b>The <i>atoB</i> gene<br/> upstream and<br/> downstream<br/> 500 bp from <i>E.<br/> coli</i> BL21</b></p> | <p>TACATAAAACGCCAATGGCTTATATGCGTGCTATCAGCGCGGCAGCACGCAGTACTG<br/> CCGGTATTCTGGTGCAATCCCTTCTACGCTGGGATCCAACCTGATGATGGAGCATTG<br/> CGGTCTGGGCGGACTCATTACCGAATTCTTCATCAATGTTGCGAACAAAGACACCTT<br/> CCCGTAATGACCTTTTTTAGTTCTGCACTGATTAACCTCGCCGTTCCGTCTGGCGGC<br/> GGTCACTGGGTTATTGAGGACCTTTCGTGATACCCGCGAGCCAGGCGCTGGGCGCT<br/> GATCTCGGTAAATCGGTAATGGCGATCGCTACGGCGAGCAATGGATGAACATGGC<br/> ACAACCATTCTGGGCGCTGCCAGCACTGGCAATCGCCGGACTCGGTGTCCGCGACAT<br/> CATGGGCTACTGCATCACTGCCCTGCTCTTCTCCGGTGTCAATTTTCGTCATTGGTTTAA<br/> CGCTGTTCTGACGGCACCCCTACAAACAGAAGGAATATAAATCAATAAAAACACCCG<br/> ATAGCGAAAGTTATCGGGTGTCTTCTGAACATCGACGGCGAAGGTAACCCCATTA<br/> TCACCAGTCAAACTTTTACCAGCGTCAGCTCACCAGCATTACGCATCGGTACAATA<br/> AATGTTTCTGTTTCTCATTGACCGATCTTCATCGGTGATCAGCGTCAGTTGGGCGG<br/> TGGTTAATTCCGTTTCGCTGCGCCCACCATAGTAGTTGATATACACCTGATAGCGCCC<br/> GTGAATTGGCGGGCATGGCGAAAATCTCGGGTCCGTACCCCGTCGTGACATCCA<br/> TATCCAGTGCACCACTGTTTTTACGACCGGTGTTACCGTACCAGGCGTGTTCCGCATC<br/> GGGCGTAACAACGTGAAGGTGAGGTCGGTATTGTCCGTATCCCACGAGAGAACCA<br/> GCCGTAAACGTGCACGAATCGTTCCTGTACCCGGCGTTGAGTAAACTGCATTTTTT<br/> GTCGGCTTTGCCATCCGGGCTGATG</p> |
| <p><b>The <i>pfIB</i> gene<br/> upstream and<br/> downstream<br/> 500bp from<br/> <i>E.coli</i> BL21</b></p>   | <p>ATATGACCGCAAATGGTCAATGGGGACTAAACGTCTACAAACCGCCGACCACAAA<br/> GTGCACCATACTTTTATTGAGGCCGTCTGTCTTGGTATCCTGGCAAACCTGATGGTAT<br/> GTCTGGCAGTATGGATGAGTTATTCTGGCCGAGCCTGATGGACAAAGCGTTCATTA<br/> TGGTGCTGCCGGTCCGATGTTTGTGCCAGCGGTTTTGAGCACAGTATCGCAAACA<br/> TGTTTATGATCCCGATGGGTATTGTAATCCGCGACTTCGCATCCCCGGAATTTTGGAC</p>                                                                                                                                                                                                                                                                                                                                                                                                                                                                                                                                                                                                                                                                                                                                                                                                               |

|                                                                                                                                                                                                                                                                                                                                                                                                                                                                                                                                                                                                                                                                                                                                                                                    |
|------------------------------------------------------------------------------------------------------------------------------------------------------------------------------------------------------------------------------------------------------------------------------------------------------------------------------------------------------------------------------------------------------------------------------------------------------------------------------------------------------------------------------------------------------------------------------------------------------------------------------------------------------------------------------------------------------------------------------------------------------------------------------------|
| CGCAGTCGGTTCTGCACCGGAAAATTTTTCTCACCTGACCGTGATGAATTCATCACT<br>GATAACCTGATTCCGGTTACGATCGGCAACATTATCGGTGGTGGTTTGTGGTTGGG<br>TTGACATACTGGGTCATTTACCTGCGTGAAAACGACCACCATTAATGGTTGTGAAG<br>TACGCAGTAAATAAAAAATCCACTTAAGAAGGTAGGTGTTACTTAGATTTGACTGAA<br>ATCGTACAGTAAAAGCGTACAATAAAGGCTCCACGAAAGTGGGGCCTTTTTTAGCG<br>CGAGAGCCTTTTTGTGAGCTATCTATACTTTAAGGTGACTGCCAAAACAGACTCGAC<br>GTAGCCTTCGAGCTGCGCACCAACACGGCCTCAGATGGGCCACATCTGGAGAAACA<br>CCGCAATGTCAGTTATTGGTCGCATTCACTCCTTTGAATCCTGTGGAACCGTAGACG<br>GCCCGGTATTGCTTTATCACCTTTTTCCAGGGCTGCCTGATGCGCTGCCTGTATTG<br>TCATAACCGCGACACCTGGGACACGCATGGCGGTAAAGAAGTTACCGTTGAAGATT<br>TGATGAAGGAAGTGGTGACCTATCGCCACTTTATGAACGCTTCCGGCGGCGGCGTT<br>ACCGCATCCGGCGGTGAAGCAATCCTGCAAGCTGAGTTTGTCGTGACTGGTTCCGC<br>GCCTGCAAAAAAGAAGGCATTCATACCTGT |
|------------------------------------------------------------------------------------------------------------------------------------------------------------------------------------------------------------------------------------------------------------------------------------------------------------------------------------------------------------------------------------------------------------------------------------------------------------------------------------------------------------------------------------------------------------------------------------------------------------------------------------------------------------------------------------------------------------------------------------------------------------------------------------|

33

34 **Supplementary Table S4 Gradient elution program for LCMS-Q-TOF**

| <b>Time (min)</b> | <b>Buffer A (%)</b> | <b>Buffer B (%)</b> |
|-------------------|---------------------|---------------------|
| 0.0               | 0                   | 100                 |
| 0.1               | 0                   | 100                 |
| 5.0               | 60                  | 40                  |
| 7.0               | 80                  | 20                  |
| 8.0               | 100                 | 0                   |
| 8.1               | 0                   | 100                 |
| 10.0              | 0                   | 100                 |

35

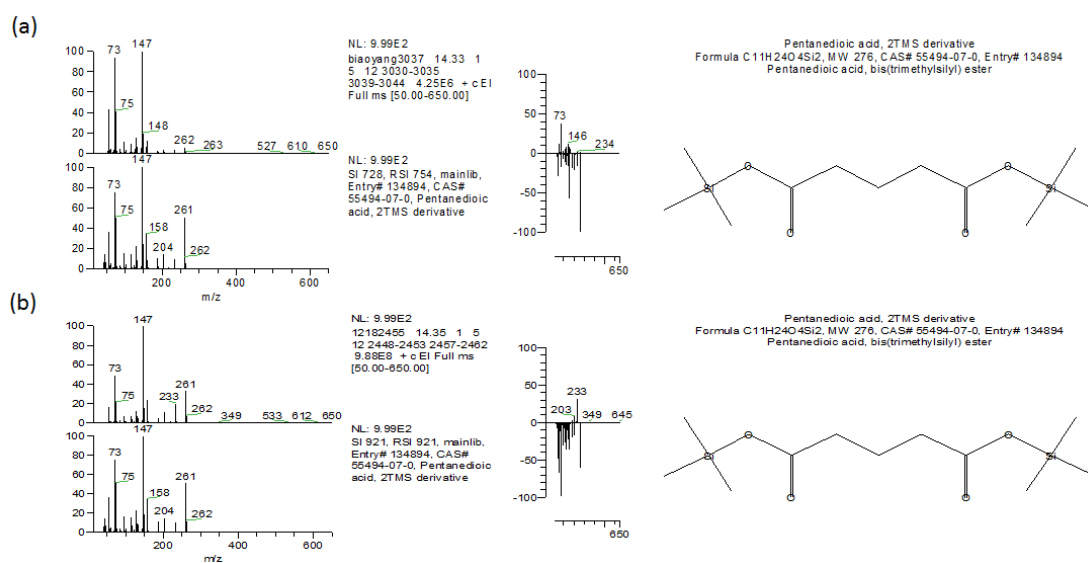

36

37 **Supplementary Figure S1. Analysis of glutarate by GC-MS.**

38 (a) Glutarate standard; (b) Glutarate from fermentation broth.

39

40



41

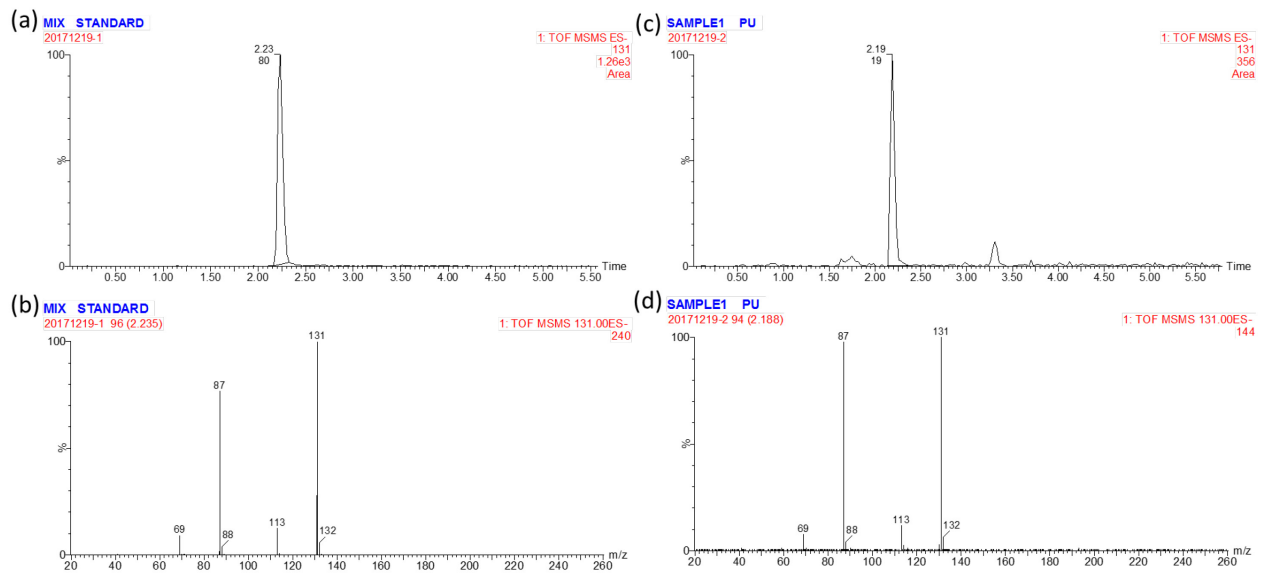

42

43 **Supplementary Figure S2. LCMS-Q-TOF results.**

44 (a) UPLC result of glutarate standard; (b) Mass spectrum of glutarate standard; (c) UPLC result of

45 glutarate sample; (d) Mass spectrum of glutarate sample.

46

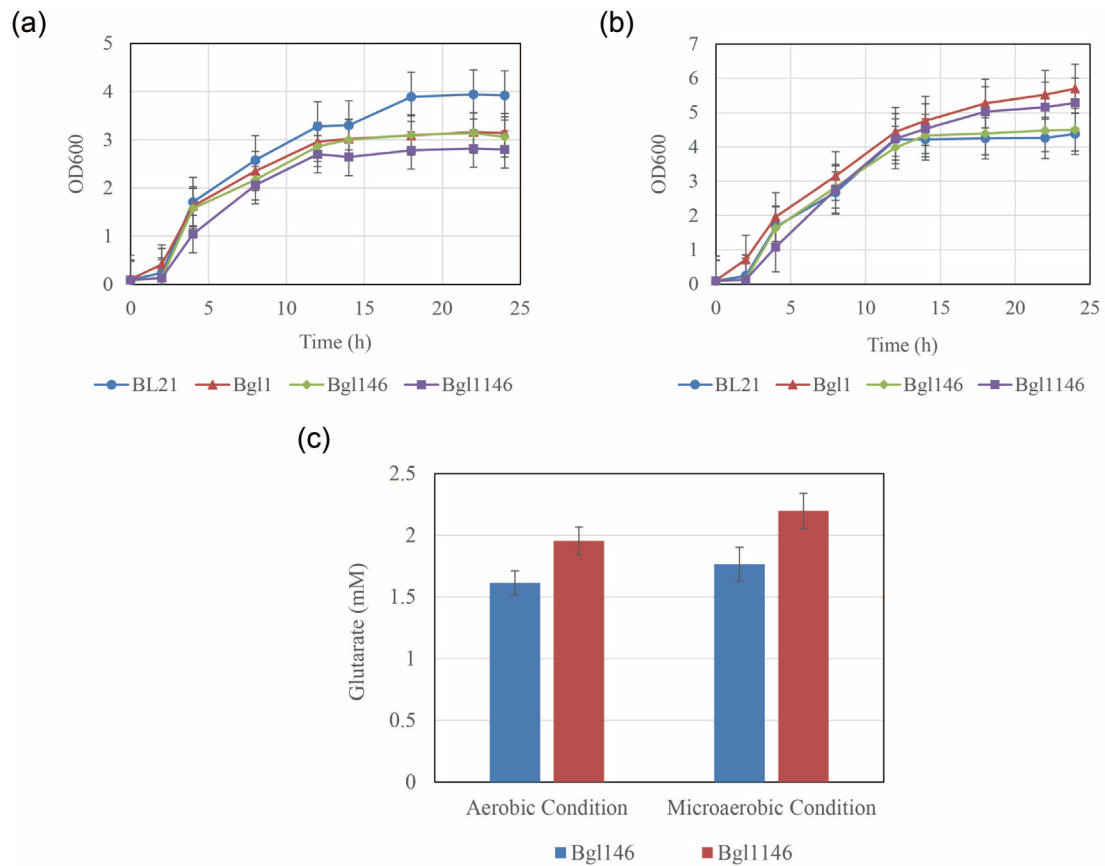

47

48 **Supplementary Figure S3. The effect of *arcA* knockout on the fermentation of glutarate.**

49 The engineered strains *E. coli* BL21, Bgl1 (BL21 $\Delta$ *arcA*), Bgl146 (BL21 carrying pAD1, pAD4 and  
 50 pAD6), and Bgl1146 (Bgl1 carrying pAD1, pAD4 and pAD6) were cultured on 22.22 mM glucose in  
 51 aerobic condition and microaerobic condition, (a) The growth curve of each engineered strain in  
 52 the microaerobic condition; (b) The growth curve of each engineered strain in the aerobic  
 53 condition; (c) Fermentation results for engineered strain *E. coli* Bgl146 and Bgl1146 in shaken  
 54 flasks in aerobic condition and microaerobic condition.

55

56

## 57 **Supplementary Materials and Methods**

### 58 **Media components**

59 The media were prepared as follow(3):

60 **Lysogeny broth (LB):** 10 g L<sup>-1</sup> NaCl, 10 g L<sup>-1</sup> tryptone, and 5 g L<sup>-1</sup> yeast extract. For  
61 agar plates.

62 **Terrific broth (TB):** 12 g L<sup>-1</sup> tryptone, 24 g L<sup>-1</sup> yeast extract, 4 mL glycerol, and  
63 phosphate buffer prepared as a 10× stock solution (final concentration in medium 6.3  
64 g L<sup>-1</sup> K<sub>2</sub>HPO<sub>4</sub> and 1.3 g L<sup>-1</sup> KH<sub>2</sub>PO<sub>4</sub>).

65 **Super optimal broth (SOB):** 20 g L<sup>-1</sup> tryptone, 5 g L<sup>-1</sup> yeast extract, 2.47 g L<sup>-1</sup>  
66 MgSO<sub>4</sub>·7H<sub>2</sub>O, 5 g L<sup>-1</sup> NaCl, 0.186 g L<sup>-1</sup> KCl, and supplemented with various  
67 concentrations of glucose.

68 **Super optimal broth with catabolite repression (SOC):** 20 g L<sup>-1</sup> tryptone, 5 g L<sup>-1</sup>  
69 yeast extract, 2.47 g L<sup>-1</sup> MgSO<sub>4</sub>·7H<sub>2</sub>O, 0.5 g L<sup>-1</sup> NaCl, 0.186 g L<sup>-1</sup> KCl, 2.033 g L<sup>-1</sup>  
70 MgCl<sub>2</sub>·6 H<sub>2</sub>O, and supplemented with various concentrations of glucose.

71 **M9:** 12.8 g L<sup>-1</sup> Na<sub>2</sub>HPO<sub>4</sub>, 3 g L<sup>-1</sup> KH<sub>2</sub>PO<sub>4</sub>, 0.5 g L<sup>-1</sup> NH<sub>4</sub>Cl, and 0.5 g L<sup>-1</sup> NaCl. The  
72 10 g L<sup>-1</sup> glucose, 0.493 g L<sup>-1</sup> MgSO<sub>4</sub>·7H<sub>2</sub>O, and 0.15 g L<sup>-1</sup> CaCl<sub>2</sub>·2H<sub>2</sub>O was sterilized  
73 separately.

74 **MOPS minimal medium (MOPS):** 40 mM MOPS (3-(N-morpholino)  
75 propanesulfonic acid) and 1.69 mM K<sub>2</sub>HPO<sub>4</sub>, supplemented with 22.2 mM glucose,  
76 100 μM FeSO<sub>4</sub>, 5 mM calcium pantothenate, 5 mM (NH<sub>4</sub>)<sub>2</sub>SO<sub>4</sub>, and 30 mM NH<sub>4</sub>Cl, 1  
77 mM MgSO<sub>4</sub>·7H<sub>2</sub>O, 0.5 mM CaCl<sub>2</sub>·2H<sub>2</sub>O, 9.6 mM glycine, and 1 mL trace-element  
78 stock solution per L medium(4). The trace-element stock solution (pH 7.5) contained  
79 13.4 mM EDTA, 31 mM FeCl<sub>3</sub>, 6 mM ZnCl<sub>2</sub>, 1.6 mM H<sub>3</sub>BO<sub>3</sub>, 0.8 mM CuCl<sub>2</sub>·2H<sub>2</sub>O,  
80 0.4 mM CoCl<sub>2</sub>·6H<sub>2</sub>O, and 3 mM (NH<sub>4</sub>)<sub>6</sub>MO<sub>7</sub>O<sub>24</sub>·4H<sub>2</sub>O and 0.08 mM MnCl<sub>2</sub>·4H<sub>2</sub>O.

81 **R medium:** 2.5 g L<sup>-1</sup> tryptone, 5 g L<sup>-1</sup> yeast extract, 2.5 g L<sup>-1</sup> NaCl, 3 g L<sup>-1</sup> cysteine,

82 and supplemented with various concentrations of glucose.

83

#### 84 **Supplementary References**

85 1. Wu JJ, Du GC, Zhou JW, Chen J. 2013. Metabolic engineering of *Escherichia*

86 *coli* for (2S)-pinocembrin production from glucose by a modular metabolic

87 strategy. *Metab Eng* 16:48-55.

88 2. Jiang Y, Chen B, Duan CL, Sun BB, Yang JJ, Yang S. 2015. Multigene Editing

89 in the *Escherichia coli* Genome via the CRISPR-Cas9 System. *Appl Environ*

90 *Microbiol* 81:2506-2514.

91 3. Neidhardt FC, Bloch PL, Smith DF. 1974. Culture medium for enterobacteria.

92 *J Bacteriol* 119:736-747.

93 4. Clomburg JM, Vick JE, Blankschien MD, Rodriguez-Moya M, Gonzalez R.

94 2012. A synthetic biology approach to engineer a functional reversal of the

95 beta-oxidation cycle. *ACS Synth Biol* 1:541-554.

96
